# Supplementary material for: CD8+ tissue-resident memory T cells induce oral lichen planus erosion via cytokine network
Source: eLife. 2023 Aug 9;12:e83981. doi: 10.7554/eLife.83981 (PMC10465124; doi:10.7554/eLife.83981)
Supplement: Figure 1—figure supplement 1—source data 1. [file elife-83981-fig1-figsupp1-data1.xlsx]

## Sheet: Sheet1
	Celltype	Var2	Freq
1	Macrophage	EOLP_1	0.12541
2	Mast cells	EOLP_1	0.15
3	mDC	EOLP_1	0.0590164
4	Neutrophil	EOLP_1	0.543443
5	pDC	EOLP_1	0.122131
6	Macrophage	EOLP_2	0.187698
7	Mast cells	EOLP_2	0.362732
8	mDC	EOLP_2	0.0746269
9	Neutrophil	EOLP_2	0.34057
10	pDC	EOLP_2	0.0343736
11	Macrophage	NEOLP_1	0.181159
12	Mast cells	NEOLP_1	0.505176
13	mDC	NEOLP_1	0.0641822
14	Neutrophil	NEOLP_1	0.226708
15	pDC	NEOLP_1	0.0227743
16	Macrophage	NEOLP_2	0.32337
17	Mast cells	NEOLP_2	0.269022
18	mDC	NEOLP_2	0.17663
19	Neutrophil	NEOLP_2	0.209239
20	pDC	NEOLP_2	0.0217391
21	Macrophage	NEOLP_3	0.38412
22	Mast cells	NEOLP_3	0.120172
23	mDC	NEOLP_3	0.167382
24	Neutrophil	NEOLP_3	0.304721
25	pDC	NEOLP_3	0.0236052
