# Supplementary material for: CD8+ tissue-resident memory T cells induce oral lichen planus erosion via cytokine network
Source: eLife. 2023 Aug 9;12:e83981. doi: 10.7554/eLife.83981 (PMC10465124; doi:10.7554/eLife.83981)
Supplement: Figure 1—figure supplement 1—source data 2. [file elife-83981-fig1-figsupp1-data2.xlsx]

## Sheet: Sheet1
	Celltype	Var2	Freq
1	Macrophage	EOLP	0.165549
2	Mast cells	EOLP	0.287088
3	mDC	EOLP	0.0690761
4	Neutrophil	EOLP	0.412708
5	pDC	EOLP	0.0655785
6	Macrophage	NEOLP	0.262778
7	Mast cells	NEOLP	0.357222
8	mDC	NEOLP	0.113889
9	Neutrophil	NEOLP	0.243333
10	pDC	NEOLP	0.0227778
