# Supplementary material for: CD8+ tissue-resident memory T cells induce oral lichen planus erosion via cytokine network
Source: eLife. 2023 Aug 9;12:e83981. doi: 10.7554/eLife.83981 (PMC10465124; doi:10.7554/eLife.83981)
Supplement: Figure 1—source data 1. [file elife-83981-fig1-data1.xlsx]

## Sheet: Sheet1
	Celltype	Var2	Freq
1	B/Plasma cells	EOLP_1	0.137769
2	Endothelial cells	EOLP_1	0.0656527
3	Epithelium cells	EOLP_1	0.0103929
4	Fibroblast cells	EOLP_1	0.0776933
5	Mast cells	EOLP_1	0.0231939
6	Myeloid cells	EOLP_1	0.131432
7	Neural cells	EOLP_1	0.0017744
8	T/NK cells	EOLP_1	0.552091
9	B/Plasma cells	EOLP_2	0.0433088
10	Endothelial cells	EOLP_2	0.152707
11	Epithelium cells	EOLP_2	0.00666955
12	Fibroblast cells	EOLP_2	0.12906
13	Mast cells	EOLP_2	0.0694673
14	Myeloid cells	EOLP_2	0.122044
15	Neural cells	EOLP_2	0.00103941
16	T/NK cells	EOLP_2	0.475704
17	B/Plasma cells	NEOLP_1	0.0374601
18	Endothelial cells	NEOLP_1	0.0278073
19	Epithelium cells	NEOLP_1	0.0584485
20	Fibroblast cells	NEOLP_1	0.170917
21	Mast cells	NEOLP_1	0.0432164
22	Myeloid cells	NEOLP_1	0.0423309
23	Neural cells	NEOLP_1	0.00150549
24	T/NK cells	NEOLP_1	0.618314
25	B/Plasma cells	NEOLP_2	0.0314728
26	Endothelial cells	NEOLP_2	0.0341627
27	Epithelium cells	NEOLP_2	0.0102219
28	Fibroblast cells	NEOLP_2	0.185071
29	Mast cells	NEOLP_2	0.0133154
30	Myeloid cells	NEOLP_2	0.0361802
31	Neural cells	NEOLP_2	0.00295898
32	T/NK cells	NEOLP_2	0.686617
33	B/Plasma cells	NEOLP_3	0.0253195
34	Endothelial cells	NEOLP_3	0.0591601
35	Epithelium cells	NEOLP_3	0.0225198
36	Fibroblast cells	NEOLP_3	0.110043
37	Mast cells	NEOLP_3	0.0068168
38	Myeloid cells	NEOLP_3	0.0499087
39	Neural cells	NEOLP_3	0.00693853
40	T/NK cells	NEOLP_3	0.719294
