# Supplementary material for: CD8+ tissue-resident memory T cells induce oral lichen planus erosion via cytokine network
Source: eLife. 2023 Aug 9;12:e83981. doi: 10.7554/eLife.83981 (PMC10465124; doi:10.7554/eLife.83981)
Supplement: Figure 1—source data 2. [file elife-83981-fig1-data2.xlsx]

## Sheet: Sheet1
	Sample	Var2	Freq
1	EOLP_1	B/Plasma cells	0.443312
2	EOLP_2	B/Plasma cells	0.203915
3	NEOLP_1	B/Plasma cells	0.172512
4	NEOLP_2	B/Plasma cells	0.0954323
5	NEOLP_3	B/Plasma cells	0.0848287
6	EOLP_1	Endothelial cells	0.155322
7	EOLP_2	Endothelial cells	0.528636
8	NEOLP_1	Endothelial cells	0.0941529
9	NEOLP_2	Endothelial cells	0.0761619
10	NEOLP_3	Endothelial cells	0.145727
11	EOLP_1	Epithelium cells	0.0759259
12	EOLP_2	Epithelium cells	0.0712963
13	NEOLP_1	Epithelium cells	0.611111
14	NEOLP_2	Epithelium cells	0.0703704
15	NEOLP_3	Epithelium cells	0.171296
16	EOLP_1	Fibroblast cells	0.0971012
17	EOLP_2	Fibroblast cells	0.236021
18	NEOLP_1	Fibroblast cells	0.305718
19	NEOLP_2	Fibroblast cells	0.217963
20	NEOLP_3	Fibroblast cells	0.143197
21	EOLP_1	Mast cells	0.112408
22	EOLP_2	Mast cells	0.492629
23	NEOLP_1	Mast cells	0.299754
24	NEOLP_2	Mast cells	0.0608108
25	NEOLP_3	Mast cells	0.034398
26	EOLP_1	Myeloid cells	0.287816
27	EOLP_2	Myeloid cells	0.391063
28	NEOLP_1	Myeloid cells	0.132667
29	NEOLP_2	Myeloid cells	0.07466
30	NEOLP_3	Myeloid cells	0.113794
31	EOLP_1	Neural cells	0.114754
32	EOLP_2	Neural cells	0.0983607
33	NEOLP_1	Neural cells	0.139344
34	NEOLP_2	Neural cells	0.180328
35	NEOLP_3	Neural cells	0.467213
36	EOLP_1	T/NK cells	0.156443
37	EOLP_2	T/NK cells	0.197242
38	NEOLP_1	T/NK cells	0.250754
39	NEOLP_2	T/NK cells	0.183343
40	NEOLP_3	T/NK cells	0.212218
