# Supplementary material for: CD8+ tissue-resident memory T cells induce oral lichen planus erosion via cytokine network
Source: eLife. 2023 Aug 9;12:e83981. doi: 10.7554/eLife.83981 (PMC10465124; doi:10.7554/eLife.83981)
Supplement: Figure 2—source data 1. [file elife-83981-fig2-data1.xlsx]

## Sheet: Sheet1
	Celltype	Var2	Freq
1	CD4+ CD8+ T	EOLP	0.089866
2	CD4+ CD8+ TRM	EOLP	0.0569659
3	CD4+ T	EOLP	0.426584
4	CD8+ T	EOLP	0.238119
5	CD8+ TRM	EOLP	0.120126
6	NK	EOLP	0.0683387
7	CD4+ CD8+ T	NEOLP	0.0661814
8	CD4+ CD8+ TRM	NEOLP	0.0443988
9	CD4+ T	NEOLP	0.388142
10	CD8+ T	NEOLP	0.354412
11	CD8+ TRM	NEOLP	0.0822961
12	NK	NEOLP	0.0645699
