# Supplementary material for: CD8+ tissue-resident memory T cells induce oral lichen planus erosion via cytokine network
Source: eLife. 2023 Aug 9;12:e83981. doi: 10.7554/eLife.83981 (PMC10465124; doi:10.7554/eLife.83981)
Supplement: Figure 4—source data 1. [file elife-83981-fig4-data1.xlsx]

## Sheet: Sheet1
Gene	Group
ITGA1	EOLP	5.42803	1.00998	3.69424	5.21303	7.095	6.01666	6.20293	7.59907	3.39314	7.54176	8.16288	9.94572	8.35856
	NEOLP	2.82524	2.27361	3.24274	5.01904	3.79575	2.94115	2.61597	3.92309	2.85687	2.56563	4.50946	3.4432	2.34596	2.83024	5.35155	3.01123	3.41112	2.55614	3.594	9.12486	3.90117	3.59476	3.44196	3.59604	2.88801	4.50915	2.06355
CD69	EOLP	9.74844	1.77213	5.93496	5.16423	5.46227	5.24093	4.28465	7.06531	1.52506	6.3151	6.26326	7.44741	17.0311
	NEOLP	2.14794	1.8124	6.22786	4.83767	3.81508	4.65507	4.48098	5.99633	3.4771	3.13264	6.68189	3.25701	1.89603	4.50906	8.90504	3.47398	4.41021	2.68209	4.6612	6.3119	1.74045	4.34834	4.11664	6.66696	9.72753	6.43933	1.91112
LITAF	EOLP	25.9858	13.3888	20.7925	25.7321	39.6807	22.4464	23.8659	37.8922	12.9054	27.2791	35.436	34.9499	57.6179
	NEOLP	8.93791	9.79019	21.5973	20.7521	19.797	19.2688	18.3488	24.8255	19.512	12.844	19.994	15.131	18.6761	20.3506	18.4687	20.7633	12.044	16.758	15.9655	30.412	11.0584	20.0279	17.2297	18.7975	29.9656	20.4643	12.2928
SKIL	EOLP	13.3397	4.59811	10.3957	11.6755	14.8031	12.6453	14.5924	16.0465	10.9566	11.0534	13.128	13.5588	17.8798
	NEOLP	7.07691	7.70734	11.2053	10.9425	10.1008	7.91758	10.7956	8.74532	9.89461	8.4392	9.40439	8.88033	10.3461	10.023	13.0041	9.90514	8.50164	9.80968	8.53894	13.0793	8.479	9.74958	10.9206	10.0235	11.9946	12.1196	9.89111
CD80	EOLP	1.71555	0.463914	1.14076	0.784055	1.6719	1.04759	0.918838	0.895574	0.164881	1.62545	1.1751	0.991385	5.61776
	NEOLP	0.79506	0.250886	0.936274	0.94016	0.683406	0.804938	0.517169	0.843409	0.927488	0.263535	0.915411	0.141563	0.518281	1.39167	1.58159	0.39752	0.71321	0.41854	0.592733	1.27837	0.097284	0.506497	0.796539	1.00101	1.44322	0.847431	0.295648
TNFRSF6B	EOLP	11.6058	15.7312	6.57432	9.67626	32.9246	11.2415	19.3453	32.6619	5.78565	21.7901	23.128	23.2101	43.4168
	NEOLP	2.74401	3.30752	7.944	9.47197	6.42861	9.01079	4.0932	10.5178	12.7508	6.92429	7.78604	4.88213	9.73174	6.76545	10.956	6.96446	5.98262	4.04344	7.47564	27.8972	1.18501	6.45878	7.95294	6.47709	10.7358	14.0117	1.31382
IFNG	EOLP	1.16309	0.226848	0.576609	0.643974	0.372915	0.487573	0.272511	0.193232	0.10673	0.787307	0.220189	0.047872	9.41927
	NEOLP	0.642744	0.18787	1.14166	0.331758	0.715485	0.556131	1.58939	1.21709	0.434079	0.29857	0.362374	0.239957	0.696742	0.757568	0.467236	0.538075	0.480764	0.619667	0.845933	0.291226	0.237774	0.612061	0.77464	0.645616	1.47518	0.110343	0.341804
IFNAR1	EOLP	EOLP	9.10439	4.06386	7.31386	8.43979	11.705	7.76057	11.4193	14.3592	6.83532	9.97986	12.8032	12.908	12.8081
	NEOLP	5.21981	5.51733	7.75058	8.45114	7.1444	5.28115	7.2802	8.18733	6.62287	5.44307	7.69958	6.39961	5.74661	6.8955	6.25685	6.22695	5.18138	5.35793	5.90749	10.7698	4.89519	7.23933	6.01834	7.03309	9.05129	7.51895	5.41533
IFNGR1	EOLP	29.5075	8.91228	25.5493	23.745	22.0479	22.8194	16.195	24.1455	13.9248	28.953	17.7187	21.7263	22.6964
	NEOLP	10.2368	10.7173	22.6138	20.4894	17.7308	16.2344	19.3831	20.9795	15.9045	17.6528	17.2858	17.0979	17.2561	23.6363	17.5838	18.9719	14.3257	25.281	17.5059	20.3794	12.8525	22.8946	16.7057	20.2829	26.8818	25.0956	15.0559
GZMB	EOLP	13.6752	2.66775	5.87494	2.12504	6.7691	5.33991	3.44427	5.83005	0.755082	10.858	8.24973	4.27837	27.3038
	NEOLP	1.33506	0.735366	6.36522	5.23569	2.93575	3.16777	4.38336	6.28858	3.04054	1.67273	2.66369	0.613463	2.71372	6.43958	6.02491	2.69427	1.9205	1.88484	2.92924	8.78264	0.583856	2.69128	2.08385	4.11259	10.5919	2.36361	1.56803
IL17RA	EOLP	7.09703	1.94004	5.15873	5.21871	6.79838	4.39667	4.64977	7.59306	3.44458	5.5323	7.74447	7.29241	11.3026
	NEOLP	3.30865	3.27741	5.59148	5.15913	4.58257	3.74752	4.40405	5.65006	3.28638	3.53948	5.51655	3.64045	3.79903	4.05638	4.02456	4.03142	3.84781	4.36205	4.45315	6.25512	2.6924	4.53335	3.73542	5.99561	6.75902	3.51078	3.10125
IL17C	EOLP	0.084036	0	1.11504	0.036282	0	0.095904	0	0.068698	0	0.106341	0.075451	0.124186	0.029417
	NEOLP	0	0.067673	0	0.031973	0.195334	0.226353	0	0.058001	0	0	0.058465	0.109013	0.064611	0.66288	0.05924	0.032432	0	0.029032	0.032299	0	0	0	0.243759	0	0.038068	1.44122	0
