# Supplementary material for: CD8+ tissue-resident memory T cells induce oral lichen planus erosion via cytokine network
Source: eLife. 2023 Aug 9;12:e83981. doi: 10.7554/eLife.83981 (PMC10465124; doi:10.7554/eLife.83981)
Supplement: Figure 4—source data 2. [file elife-83981-fig4-data2.xlsx]

## Sheet: Sheet1
Gene	Group
ITGA1	EOLP	3.69424	7.095	7.54176	8.16288	9.94572	8.35856	5.01904	3.4432	4.50915	5.42803
	NEOLP	6.20293	3.79575	3.92309	1.00998	5.21303	6.01666	7.59907	3.39314	2.82524	2.27361	3.24274	2.94115	2.61597	2.85687	2.56563	4.50946	2.34596	2.83024	5.35155	3.01123	3.41112	2.55614	3.594	9.12486	3.90117	3.59476	3.44196	3.59604	2.88801	2.06355
CD69	EOLP	5.93496	5.46227	6.3151	6.26326	7.44741	17.0311	4.83767	3.25701	6.43933	9.74844
	NEOLP	4.28465	3.81508	5.99633	1.77213	5.16423	5.24093	7.06531	1.52506	2.14794	1.8124	6.22786	4.65507	4.48098	3.4771	3.13264	6.68189	1.89603	4.50906	8.90504	3.47398	4.41021	2.68209	4.6612	6.3119	1.74045	4.34834	4.11664	6.66696	9.72753	1.91112
LITAF	EOLP	20.7925	39.6807	27.2791	35.436	34.9499	57.6179	20.7521	15.131	20.4643	25.9858
	NEOLP	23.8659	19.797	24.8255	13.3888	25.7321	22.4464	37.8922	12.9054	8.93791	9.79019	21.5973	19.2688	18.3488	19.512	12.844	19.994	18.6761	20.3506	18.4687	20.7633	12.044	16.758	15.9655	30.412	11.0584	20.0279	17.2297	18.7975	29.9656	12.2928
SKIL	EOLP	10.3957	14.8031	11.0534	13.128	13.5588	17.8798	10.9425	8.88033	12.1196	13.3397
	NEOLP	14.5924	10.1008	8.74532	4.59811	11.6755	12.6453	16.0465	10.9566	7.07691	7.70734	11.2053	7.91758	10.7956	9.89461	8.4392	9.40439	10.3461	10.023	13.0041	9.90514	8.50164	9.80968	8.53894	13.0793	8.479	9.74958	10.9206	10.0235	11.9946	9.89111
CD80	EOLP	1.71555	1.14076	1.6719	1.62545	1.1751	0.991385	5.61776	0.94016	0.141563	0.847431
	NEOLP	0.918838	0.683406	0.843409	0.463914	0.784055	1.04759	0.895574	0.164881	0.79506	0.250886	0.936274	0.804938	0.517169	0.927488	0.263535	0.915411	0.518281	1.39167	1.58159	0.39752	0.71321	0.41854	0.592733	1.27837	0.097284	0.506497	0.796539	1.00101	1.44322	0.295648
TNFRSF6B	EOLP	9.47197	4.88213	14.0117	11.6058	6.57432	32.9246	21.7901	23.128	23.2101	43.4168
	NEOLP	2.74401	3.30752	7.944	6.42861	9.01079	4.0932	10.5178	12.7508	6.92429	7.78604	9.73174	6.76545	10.956	6.96446	5.98262	4.04344	7.47564	27.8972	1.18501	6.45878	7.95294	6.47709	10.7358	1.31382	15.7312	9.67626	11.2415	19.3453	32.6619	5.78565
IFNG	EOLP	0.576609	0.372915	0.787307	0.220189	0.047872	9.41927	0.331758	0.239957	0.110343	1.16309
	NEOLP	0.272511	0.715485	1.21709	0.226848	0.643974	0.487573	0.193232	0.10673	0.642744	0.18787	1.14166	0.556131	1.58939	0.434079	0.29857	0.362374	0.696742	0.757568	0.467236	0.538075	0.480764	0.619667	0.845933	0.291226	0.237774	0.612061	0.77464	0.645616	1.47518	0.341804
IFNAR1	EOLP	7.31386	11.705	9.97986	12.8032	12.908	12.8081	8.45114	6.39961	7.51895	9.10439
	NEOLP	11.4193	7.1444	8.18733	4.06386	8.43979	7.76057	14.3592	6.83532	5.21981	5.51733	7.75058	5.28115	7.2802	6.62287	5.44307	7.69958	5.74661	6.8955	6.25685	6.22695	5.18138	5.35793	5.90749	10.7698	4.89519	7.23933	6.01834	7.03309	9.05129	5.41533
IFNGR1	EOLP	25.5493	22.0479	28.953	17.7187	21.7263	22.6964	20.4894	17.0979	25.0956	29.5075
	NEOLP	16.195	17.7308	20.9795	8.91228	23.745	22.8194	24.1455	13.9248	10.2368	10.7173	22.6138	16.2344	19.3831	15.9045	17.6528	17.2858	17.2561	23.6363	17.5838	18.9719	14.3257	25.281	17.5059	20.3794	12.8525	22.8946	16.7057	20.2829	26.8818	15.0559
GZMB	EOLP	5.87494	6.7691	10.858	8.24973	4.27837	27.3038	5.23569	0.613463	2.36361	13.6752
	NEOLP	3.44427	2.93575	6.28858	2.66775	2.12504	5.33991	5.83005	0.755082	1.33506	0.735366	6.36522	3.16777	4.38336	3.04054	1.67273	2.66369	2.71372	6.43958	6.02491	2.69427	1.9205	1.88484	2.92924	8.78264	0.583856	2.69128	2.08385	4.11259	10.5919	1.56803
IL17RA	EOLP	5.15873	6.79838	5.5323	7.74447	7.29241	11.3026	5.15913	3.64045	3.51078	7.09703
	NEOLP	1.94004	5.21871	4.39667	7.59306	3.44458	3.30865	3.27741	5.59148	3.74752	4.40405	3.28638	3.53948	5.51655	3.79903	4.05638	4.02456	4.03142	3.84781	4.36205	4.45315	6.25512	2.6924	4.53335	3.73542	5.99561	6.75902	3.10125
IL17C	EOLP	0.084036	1.11504	0	0.106341	0.075451	0.124186	0.029417	0.031973	0.109013	1.44122
	NEOLP	0	0.036282	0.095904	0	0.068698	0	0	0.067673	0	0.195334	0.226353	0	0.058001	0	0	0.058465	0.064611	0.66288	0.05924	0.032432	0	0.029032	0.032299	0	0	0	0.243759	0	0.038068	0
