# Supplementary material for: CD8+ tissue-resident memory T cells induce oral lichen planus erosion via cytokine network
Source: eLife. 2023 Aug 9;12:e83981. doi: 10.7554/eLife.83981 (PMC10465124; doi:10.7554/eLife.83981)
Supplement: Figure 5—source data 1. [file elife-83981-fig5-data1.xlsx]

## Sheet: Sheet1
	CD8+Trm content
Group	EOLP	NEOLP
	0.9	0.7
	3.3	0.5
	0.7	0.3
	3.2	0.1
	1.1	1.3
	4.5	1.9
	3.7
	2.6
