# Supplementary material for: CD8+ tissue-resident memory T cells induce oral lichen planus erosion via cytokine network
Source: eLife. 2023 Aug 9;12:e83981. doi: 10.7554/eLife.83981 (PMC10465124; doi:10.7554/eLife.83981)
Supplement: Figure 5—source data 2. [file elife-83981-fig5-data2.xlsx]

## Sheet: Sheet1
	Group
TNF-α	EOLP	1.91	1.02	5.47	1.48	1.66	4.83
	NEOLP	1.48	1.05	1.91	1.66	2.29	1.48	1.91	2.34	2.92	1.66
INF-γ	EOLP	3.29	13.78	12.94	4.65	12.11	15.44
	NEOLP	5.1	3.29	5.1	2.98	12.11	4.38	4.38	5.83	2.15	12.11
IL-17	EOLP	2.03	2	2.83	1.09	1.18	3.67
	NEOLP	1.88	1.56	1.4	2	3.67	1.56	1.72	2.03	2.83	2.83
