# Supplementary material for: CD8+ tissue-resident memory T cells induce oral lichen planus erosion via cytokine network
Source: eLife journal article supplement (doi:10.7554/elife.83981), 2023-08-09
Supplement: supp [file elife-83981-supp-v1.zip]

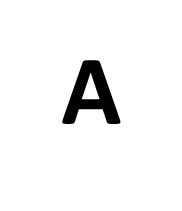


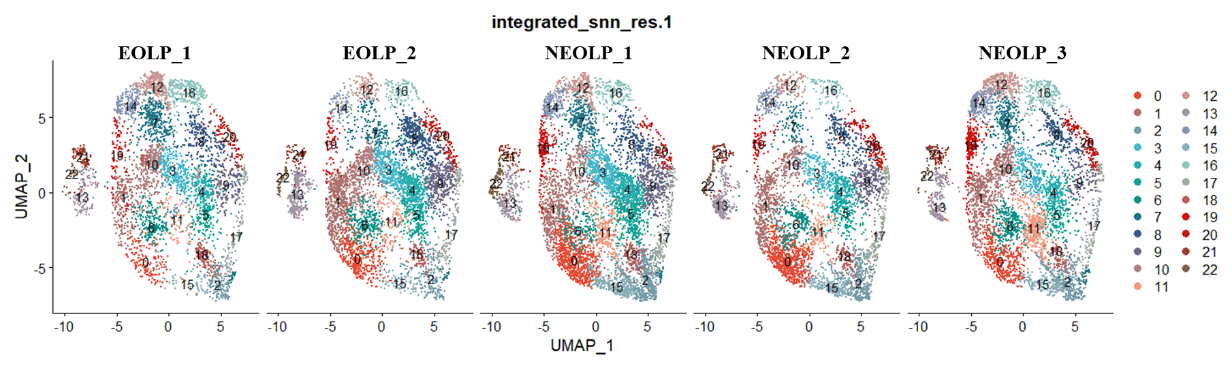


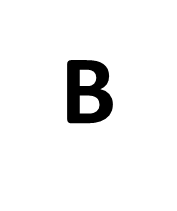


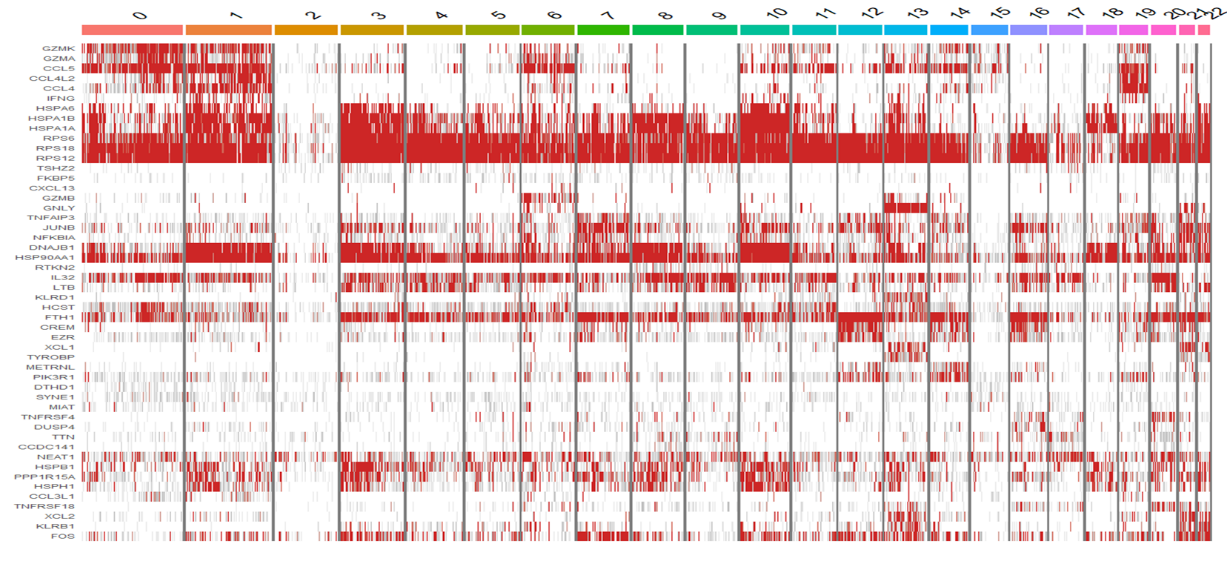


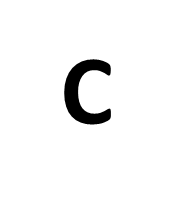


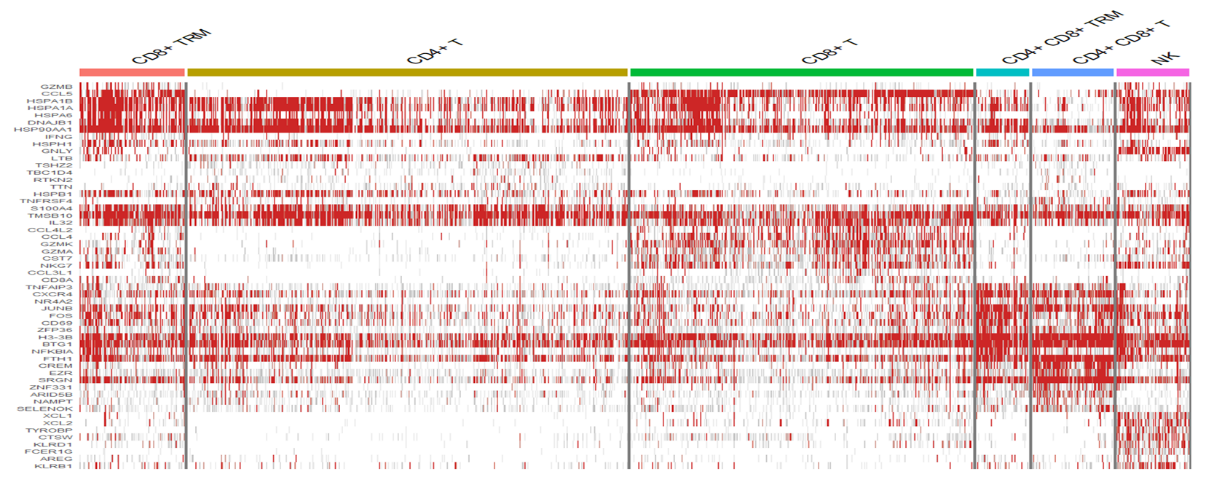


Figure 2-figure supplement 2. (A) Transcription atlas of NK/T cells clustering in each OLP sample. (B) Heatmap of differentially expressed genes per cluster in NK/T cells. (C) Heatmap of expressed genes for each cell subpopulation in NK/T cells.
