# Supplementary material for: CD8+ tissue-resident memory T cells induce oral lichen planus erosion via cytokine network
Source: eLife journal article supplement (doi:10.7554/elife.83981), 2023-08-09
Supplement: supp [file elife_poa_e83981_Figure_1_figure_supplement_1.docx]

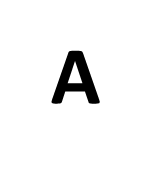


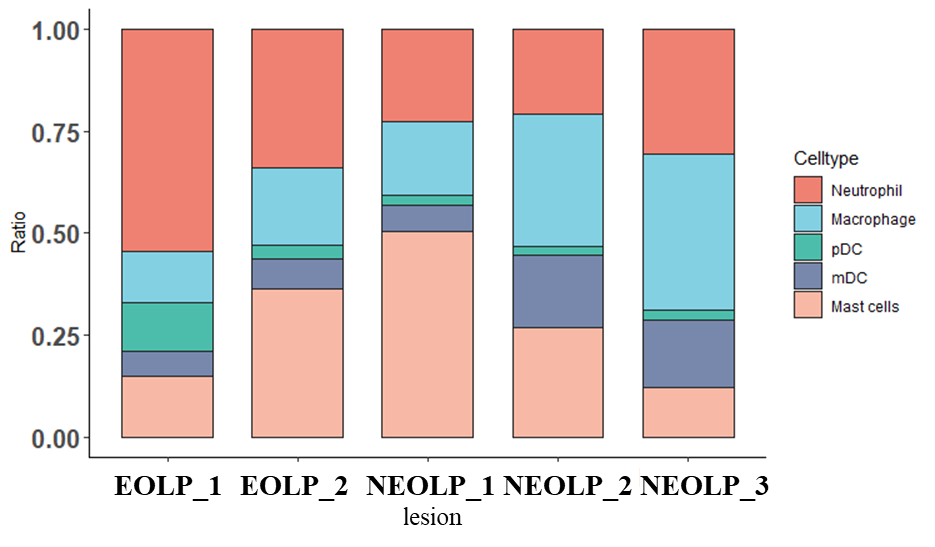


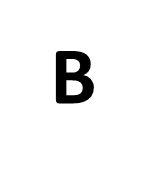


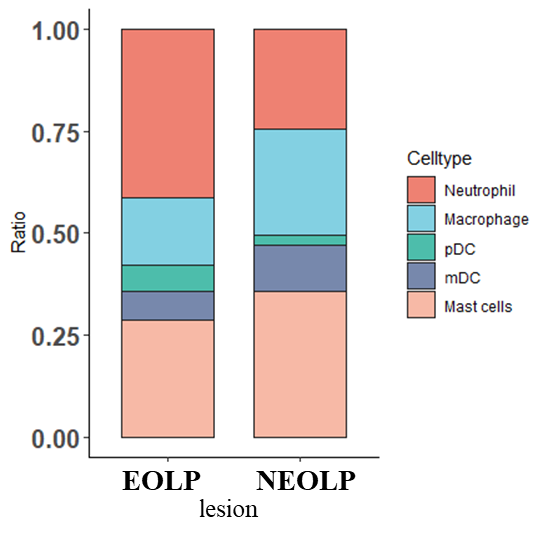


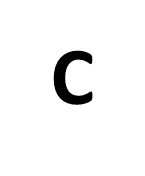


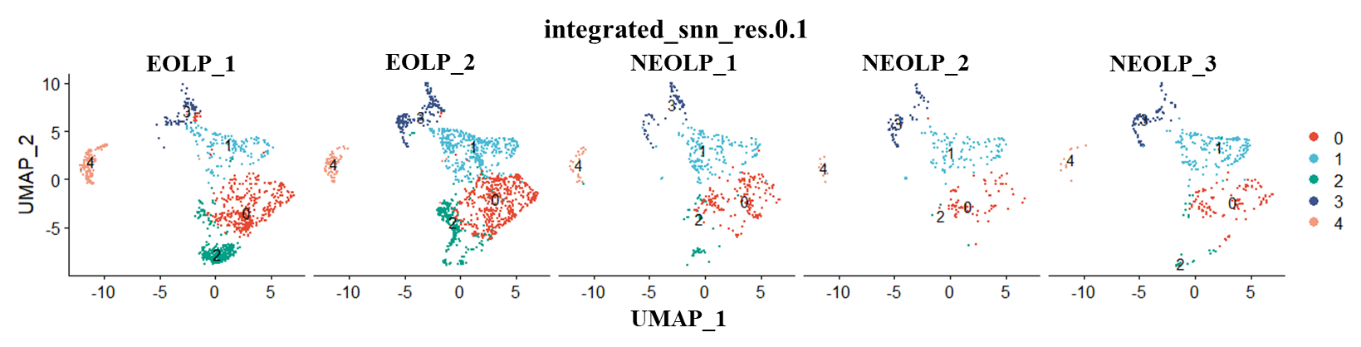


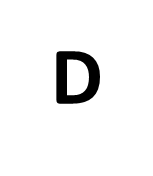


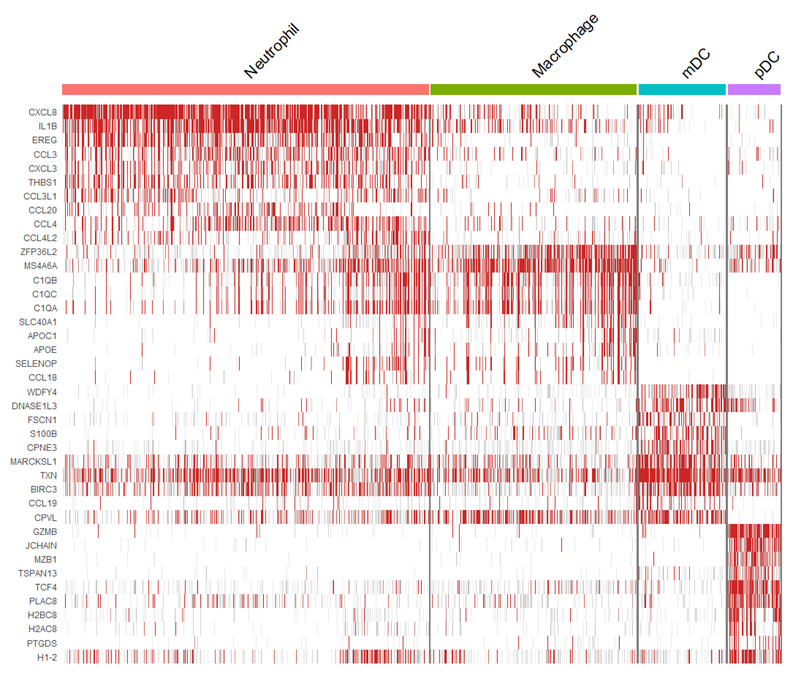


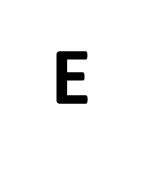


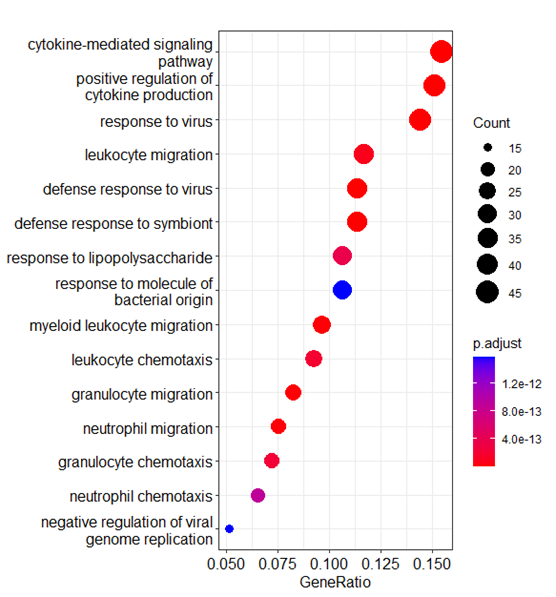


Figure 1-figure supplement 1. The characteristics of myeloid cells in OLPs. (A) Bar plot showing the percentage of myeloid subsets in different samples. (B) The proportion of each cell subsets of myeloid in EOLP/NEOLP. (C) Transcription atlas of myeloid cells clustering in each OLP sample (0,2-Neutrophil, 1-Macrophage, 3-mDC, 4-pDC). (D) Heatmap of expressed genes for myeloid subpopulation in OLP. (E) GO enrichment analysis dot plot of myeloid cell DEGs between EOLP and NEOLP.
