# Supplementary material for: CD8+ tissue-resident memory T cells induce oral lichen planus erosion via cytokine network
Source: eLife journal article supplement (doi:10.7554/elife.83981), 2023-08-09
Supplement: supp [file elife_poa_e83981_Figure_2_figure_supplement_2.docx]

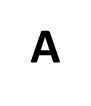


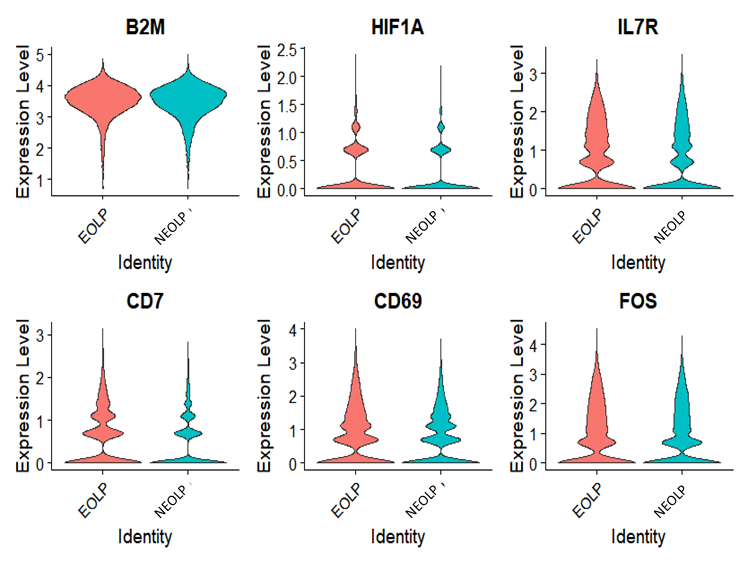


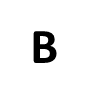


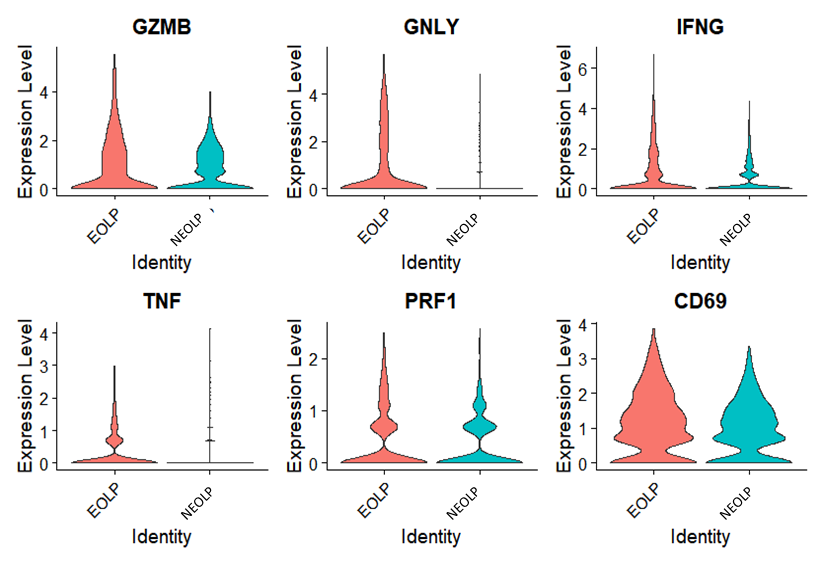


Figure 2-figure supplement 3. Analysis of differentially expressed genes (DEGs) in OLPs. (A) The differential gene violin plot for EOLP/ NEOLP with statistical significance. (B) The differential gene violin plot for CD8+ Trm cluster in EOLP/ NEOLP with statistical significance.
